# Supplementary material
Source: PubMed Central journal article supplement (PMC3228906)
Supplement: NIHMS330685-supplement-Supp_Table_S2.pdf [file NIHMS330685-supplement-Supp_Table_S2.pdf]

**Table S2.** Summary of NA-WB-AIV nucleotide sequences used in this study. Only U.S. states and Canadian provinces with more than five sequences (average across different genes, with the exception of North Dakota and South Dakota) are shown in detail, otherwise they are classified as 'Others' and excluded. PF, CF, MF, and AF denote the Pacific flyway, Central flyway, Mississippi flyway, and Atlantic flyway, respectively.

| Country | Province/State | Abbrev. | Flyway                 | PB2         | PB1         | PA-A       | PA-B       | NP          | MP          | NS-A       | NS-B       | H3         | H4         | N6         | N8         |
|---------|----------------|---------|------------------------|-------------|-------------|------------|------------|-------------|-------------|------------|------------|------------|------------|------------|------------|
| Canada  | Alberta        | AB      | CF                     | 172         | 162         | 103        | 46         | 183         | 255         | 140        | 78         | 32         | 40         | 40         | 33         |
| Canada  | Quebec         | QC      | AF                     | 19          | 19          | 11         | 8          | 19          | 19          | 16         | 3          | 8          | 6          | 5          | 1          |
| U.S.A.  | Alaska         | AK      | PF                     | 96          | 101         | 66         | 36         | 93          | 109         | 38         | 72         | 42         | 30         | 25         | 57         |
| U.S.A.  | California     | CA      | PF                     | 131         | 129         | 82         | 48         | 123         | 131         | 97         | 36         | 15         | 8          | 12         | 9          |
| U.S.A.  | Delaware       | DE      | AF                     | 65          | 80          | 56         | 19         | 66          | 81          | 69         | 4          | 1          | 5          | 7          | 7          |
| U.S.A.  | Louisiana      | LA      | MF                     | 13          | 15          | 4          | 12         | 9           | 13          | 6          | 2          | 4          | 1          | 1          | 5          |
| U.S.A.  | Maryland       | MD      | AF                     | 81          | 84          | 56         | 26         | 87          | 86          | 72         | 16         | 9          | 4          | 4          | 6          |
| U.S.A.  | Minnesota      | MN      | MF                     | 246         | 257         | 153        | 102        | 67          | 185         | 54         | 34         | 109        | 73         | 58         | 92         |
| U.S.A.  | North Dakota   | ND      | CF                     | 13          | 13          | 8          | 5          | 0           | 0           | 0          | 0          | 12         | 26         | 0          | 0          |
| U.S.A.  | New Jersey     | NJ      | AF                     | 140         | 140         | 108        | 37         | 48          | 60          | 42         | 11         | 12         | 26         | 32         | 5          |
| U.S.A.  | New York       | NY      | AF                     | 72          | 78          | 47         | 26         | 69          | 87          | 23         | 53         | 5          | 4          | 1          | 7          |
| U.S.A.  | Ohio           | OH      | MF                     | 119         | 120         | 96         | 23         | 127         | 130         | 102        | 30         | 19         | 22         | 20         | 23         |
| U.S.A.  | Oregon         | OR      | PF                     | 13          | 13          | 8          | 5          | 11          | 13          | 6          | 6          | 6          | 1          | 2          | 6          |
| U.S.A.  | South Dakota   | SD      | CF                     | 9           | 9           | 3          | 6          | 0           | 0           | 0          | 0          | 2          | 4          | 0          | 1          |
| U.S.A.  | Texas          | TX      | CF                     | 29          | 35          | 20         | 16         | 10          | 15          | 7          | 6          | 7          | 19         | 15         | 10         |
| U.S.A.  | Washington     | WA      | PF                     | 47          | 46          | 11         | 36         | 44          | 47          | 31         | 16         | 4          | 12         | 12         | 3          |
|         | Others         |         |                        | 51          | 45          | 30         | 15         | 46          | 50          | 32         | 19         | 7          | 5          | 5          | 5          |
|         |                |         | <i>Total:</i>          | <i>1316</i> | <i>1346</i> | <i>862</i> | <i>466</i> | <i>1002</i> | <i>1281</i> | <i>735</i> | <i>386</i> | <i>294</i> | <i>286</i> | <i>239</i> | <i>270</i> |
|         |                |         | Alignment length (nt): | 2277        | 2271        | 2148       | 2148       | 1494        | 982         | 838        | 838        | 1698       | 1692       | 1410       | 1410       |
