# Supplementary material
Source: PubMed Central journal article supplement (PMC3228906)
Supplement: NIHMS330685-supplement-Supp_Table_S3.pdf [file NIHMS330685-supplement-Supp_Table_S3.pdf]

**Table S3.** Levels of gene flow within and between the four American flyways. These estimates were independently inferred using both the parsimony ( $\sigma$ ) and maximum likelihood (ML) methods ( $q$ ). PF, CF, MF and AF denote the Pacific flyway, Central flyway, Mississippi flyway and Atlantic flyway, respectively. Each estimate was inferred from 200 randomly selected ML bootstrap phylogenies. Higher and lower 95% confidence intervals are shown in parenthesis. All estimates are non-directional.

| Method                            | Gene data set <sup>1</sup> | From / To           | To / From           |                     |                     |                     |
|-----------------------------------|----------------------------|---------------------|---------------------|---------------------|---------------------|---------------------|
|                                   |                            |                     | PF                  | CF                  | MF                  | AF                  |
| Pars.<br>4-flyway<br>( $\sigma$ ) | PB2                        | PF                  | 0.268 (0.258-0.28)  | 0.144 (0.131-0.156) | 0.099 (0.092-0.106) | 0.029 (0.025-0.033) |
|                                   |                            | CF                  | 0.144 (0.131-0.156) | 0.109 (0.076-0.156) | 0.273 (0.258-0.296) | 0.036 (0.026-0.05)  |
|                                   |                            | MF                  | 0.099 (0.092-0.106) | 0.273 (0.258-0.296) | 0.272 (0.247-0.3)   | 0.112 (0.105-0.119) |
|                                   |                            | AF                  | 0.029 (0.025-0.033) | 0.036 (0.026-0.05)  | 0.112 (0.105-0.119) | 0.143 (0.133-0.151) |
|                                   | PB1                        | PF                  | 0.287 (0.274-0.3)   | 0.136 (0.12-0.15)   | 0.101 (0.094-0.11)  | 0.014 (0.012-0.019) |
|                                   |                            | CF                  | 0.136 (0.12-0.15)   | 0.091 (0.046-0.15)  | 0.266 (0.247-0.294) | 0.036 (0.03-0.043)  |
|                                   |                            | MF                  | 0.101 (0.094-0.11)  | 0.266 (0.247-0.294) | 0.262 (0.237-0.286) | 0.125 (0.117-0.132) |
|                                   |                            | AF                  | 0.014 (0.012-0.019) | 0.036 (0.03-0.043)  | 0.125 (0.117-0.132) | 0.153 (0.144-0.162) |
|                                   | PA<br>(lineage<br>B)       | PF                  | 0.226 (0.219-0.239) | 0.084 (0.072-0.101) | 0.103 (0.093-0.11)  | 0.015 (0.012-0.02)  |
|                                   |                            | CF                  | 0.084 (0.072-0.101) | 0.035 (0.021-0.101) | 0.444 (0.41-0.478)  | 0.021 (0.012-0.032) |
|                                   |                            | MF                  | 0.103 (0.093-0.11)  | 0.444 (0.41-0.478)  | 0.371 (0.339-0.406) | 0.127 (0.119-0.137) |
|                                   |                            | AF                  | 0.015 (0.012-0.02)  | 0.021 (0.012-0.032) | 0.127 (0.119-0.137) | 0.18 (0.168-0.19)   |
|                                   | PA<br>(lineage<br>A)       | PF                  | 0.338 (0.314-0.364) | 0.111 (0.095-0.13)  | 0.14 (0.125-0.154)  | 0.025 (0.019-0.032) |
|                                   |                            | CF                  | 0.111 (0.095-0.13)  | 0.035 (0.006-0.057) | 0.34 (0.307-0.378)  | 0.031 (0.017-0.044) |
|                                   |                            | MF                  | 0.14 (0.125-0.154)  | 0.34 (0.307-0.378)  | 0.41 (0.37-0.458)   | 0.091 (0.083-0.106) |
|                                   |                            | AF                  | 0.025 (0.019-0.032) | 0.031 (0.017-0.044) | 0.031 (0.017-0.044) | 0.116 (0.109-0.127) |
|                                   | NP                         | PF                  | 0.349 (0.337-0.363) | 0.177 (0.157-0.196) | 0.082 (0.069-0.096) | 0.035 (0.03-0.04)   |
|                                   |                            | CF                  | 0.177 (0.157-0.196) | 0 (0-0.124)         | 0.372 (0.317-0.418) | 0.06 (0.04-0.082)   |
|                                   |                            | MF                  | 0.082 (0.069-0.096) | 0.372 (0.317-0.418) | 0.495 (0.442-0.557) | 0.174 (0.16-0.19)   |
|                                   |                            | AF                  | 0.035 (0.03-0.04)   | 0.06 (0.04-0.082)   | 0.174 (0.16-0.19)   | 0.165 (0.154-0.177) |
| MP                                | PF                         | 0.313 (0.283-0.345) | 0.119 (0.095-0.143) | 0.114 (0.101-0.158) | 0.028 (0.021-0.037) |                     |
|                                   | CF                         | 0.119 (0.095-0.143) | 0.19 (0.137-0.285)  | 0.246 (0.212-0.281) | 0.046 (0.03-0.073)  |                     |
|                                   | MF                         | 0.114 (0.101-0.158) | 0.246 (0.212-0.281) | 0.342 (0.284-0.398) | 0.139 (0.125-0.155) |                     |
|                                   | AF                         | 0.028 (0.021-0.037) | 0.046 (0.03-0.073)  | 0.139 (0.125-0.155) | 0.156 (0.143-0.172) |                     |

|                                |                      |                     |                        |                        |                        |                        |
|--------------------------------|----------------------|---------------------|------------------------|------------------------|------------------------|------------------------|
| NS<br>(allele<br>A)            | PF                   | 0.493 (0.448-0.536) | 0.136 (0.103-0.174)    | 0.094 (0.069-0.128)    | 0.046 (0.035-0.057)    |                        |
|                                | CF                   | 0.136 (0.103-0.174) | n.a.                   | 0.382 (0.284-0.46)     | 0.153 (0.108-0.195)    |                        |
|                                | MF                   | 0.094 (0.069-0.128) | 0.382 (0.284-0.46)     | 0.364 (0.283-0.456)    | 0.193 (0.17-0.223)     |                        |
|                                | AF                   | 0.046 (0.035-0.057) | 0.153 (0.108-0.195)    | 0.193 (0.17-0.223)     | 0.228 (0.206-0.254)    |                        |
| NS<br>(allele<br>B)            | PF                   | 0.27 (0.229-0.324)  | 0.218 (0.169-0.26)     | 0.098 (0.07-0.125)     | 0.036 (0.023-0.051)    |                        |
|                                | CF                   | 0.218 (0.169-0.26)  | 0.321 (0.079-0.566)    | 0.331 (0.249-0.445)    | 0.089 (0.055-0.119)    |                        |
|                                | MF                   | 0.098 (0.07-0.125)  | 0.331 (0.249-0.445)    | 0.384 (0.264-0.536)    | 0.151 (0.125-0.181)    |                        |
|                                | AF                   | 0.036 (0.023-0.051) | 0.089 (0.055-0.119)    | 0.151 (0.125-0.181)    | 0.195 (0.157-0.229)    |                        |
| HA (H3)                        | PF                   | 0.246 (0.213-0.25)  | 0.16 (0.137-0.187)     | 0.038 (0.026-0.05)     | 0 (0-0)                |                        |
|                                | CF                   | 0.16 (0.137-0.187)  | 0.074 (0.02-0.115)     | 0.323 (0.292-0.352)    | 0 (0-0.019)            |                        |
|                                | MF                   | 0.038 (0.026-0.05)  | 0.323 (0.292-0.352)    | 0.354 (0.287-0.439)    | 0.136 (0.101-0.15)     |                        |
|                                | AF                   | 0 (0-0)             | 0 (0-0.019)            | 0.136 (0.101-0.15)     | 0.106 (0.104-0.108)    |                        |
| HA (H4)                        | PF                   | 0.206 (0.163-0.242) | 0.091 (0.074-0.116)    | 0.035 (0.022-0.053)    | 0.017 (0.017-0.018)    |                        |
|                                | CF                   | 0.091 (0.074-0.116) | 0.189 (0.128-0.26)     | 0.376 (0.341-0.407)    | 0.03 (0.022-0.043)     |                        |
|                                | MF                   | 0.035 (0.022-0.053) | 0.376 (0.341-0.407)    | 0.157 (0.137-0.249)    | 0.175 (0.157-0.186)    |                        |
|                                | AF                   | 0.017 (0.017-0.018) | 0.03 (0.022-0.043)     | 0.175 (0.157-0.186)    | 0.345 (0.314-0.363)    |                        |
| NA (N6)                        | PF                   | 0.208 (0.186-0.239) | 0.145 (0.108-0.18)     | 0.058 (0.037-0.077)    | 0.012 (0.01-0.028)     |                        |
|                                | CF                   | 0.145 (0.108-0.18)  | 0.31 (0.037-0.513)     | 0.373 (0.328-0.425)    | 0.036 (0.002-0.045)    |                        |
|                                | MF                   | 0.058 (0.037-0.077) | 0.373 (0.328-0.425)    | 0.22 (0.15-0.285)      | 0.1 (0.086-0.12)       |                        |
|                                | AF                   | 0.012 (0.01-0.028)  | 0.036 (0.002-0.045)    | 0.1 (0.086-0.12)       | n.a.                   |                        |
| NA (N8)                        | PF                   | 0.66 (0.568-0.692)  | 0.144 (0.107-0.18)     | 0.042 (0.027-0.07)     | 0.051 (0.051-0.093)    |                        |
|                                | CF                   | 0.144 (0.107-0.18)  | 0 (0-0.208)            | 0.245 (0.202-0.301)    | 0.005 (0-0.063)        |                        |
|                                | MF                   | 0.042 (0.027-0.07)  | 0.245 (0.202-0.301)    | 0.525 (0.446-0.602)    | 0.359 (0.309-0.416)    |                        |
|                                | AF                   | 0.051 (0.051-0.093) | 0.005 (0-0.063)        | 0.359 (0.309-0.416)    | n.a.                   |                        |
| <b>ML<br/>4-flyway<br/>(q)</b> | PB2                  | PF                  | 27.809 (25.096-31.048) | 5.48 (4.89-6.907)      | 5.988 (5.216-6.844)    | 0.66 (0.133-1.018)     |
|                                |                      | CF                  | 5.48 (4.89-6.907)      | 9.518 (5.269-18.582)   | 13.734 (12.116-16.585) | 1.344 (0.491-2.804)    |
|                                |                      | MF                  | 5.988 (5.216-6.844)    | 13.734 (12.116-16.585) | 12.214 (9.829-14.596)  | 10.216 (9.259-11.502)  |
|                                |                      | AF                  | 0.66 (0.133-1.018)     | 1.344 (0.491-2.804)    | 10.216 (9.259-11.502)  | 33.112 (29.108-38.158) |
|                                | PB1                  | PF                  | 34.627 (30.497-40.414) | 8.638 (7.532-10.247)   | 5.231 (4.253-6.323)    | 0 (0-0.006)            |
|                                |                      | CF                  | 8.638 (7.532-10.247)   | 8.842 (3.946-17.22)    | 18.888 (15.881-22.008) | 1.205 (0.443-2.026)    |
|                                |                      | MF                  | 5.231 (4.253-6.323)    | 18.888 (15.881-22.008) | 12.295 (9.116-15.91)   | 11.897 (10.691-13.109) |
|                                |                      | AF                  | 0 (0-0.006)            | 1.205 (0.443-2.026)    | 11.897 (10.691-13.109) | 35.283 (30.684-40.429) |
|                                | PA<br>(lineage<br>B) | PF                  | 11.139 (9.578-14.307)  | 3.328 (1.57-4.589)     | 4.016 (3.014-5.336)    | 0.183 (0-0.579)        |
|                                |                      | CF                  | 3.328 (1.57-4.589)     | 0 (0-0)                | 15.329 (13.063-18.51)  | 0 (0-0.187)            |
|                                |                      | MF                  | 4.016 (3.014-5.336)    | 15.329 (13.063-18.51)  | 28.96 (24.186-35.446)  | 7.745 (6.719-8.995)    |

|                      |    |                        |                        |                        |                        |
|----------------------|----|------------------------|------------------------|------------------------|------------------------|
|                      | AF | 0.183 (0-0.579)        | 0 (0-0.187)            | 7.745 (6.719-8.995)    | 19.386 (16.562-23.088) |
| PA<br>(lineage<br>A) | PF | 44.081 (36.109-55.732) | 1.066 (0-4.152)        | 6.848 (4.841-9.05)     | 0.289 (0-0.904)        |
|                      | CF | 1.066 (0-4.152)        | 1.644 (0-36.11)        | 16.894 (12.454-26.404) | 2.273 (0-6.932)        |
|                      | MF | 6.848 (4.841-9.05)     | 16.894 (12.454-26.404) | 9.17 (2.951-16.206)    | 3.553 (1.289-4.755)    |
|                      | AF | 0.289 (0-0.904)        | 2.273 (0-6.932)        | 3.553 (1.289-4.755)    | 24.245 (19.059-29.944) |
| NP                   | PF | 22.503 (19.153-26.754) | 3.999 (3.472-4.73)     | 0 (0-0.593)            | 1.155 (0.988-1.352)    |
|                      | CF | 3.999 (3.472-4.73)     | 0 (0-0)                | 11.697 (9.431-13.584)  | 0 (0-0.387)            |
|                      | MF | 0 (0-0.593)            | 11.697 (9.431-13.584)  | 39.994 (33.008-53.714) | 6.641 (5.826-7.638)    |
|                      | AF | 1.155 (0.988-1.352)    | 0 (0-0.387)            | 6.641 (5.826-7.638)    | 18.88 (15.271-23.137)  |
| MP                   | PF | 29.862 (21.105-40.135) | 5.474 (3.582-7.728)    | 4.86 (3.38-7.037)      | 0.728 (0.336-1.469)    |
|                      | CF | 5.474 (3.582-7.728)    | 3.928 (0-14.153)       | 17.374 (13.105-23.093) | 1.455 (0-4.113)        |
|                      | MF | 4.86 (3.38-7.037)      | 17.374 (13.105-23.093) | 35.258 (21.124-66.319) | 9.344 (7.283-12.447)   |
|                      | AF | 0.728 (0.336-1.469)    | 1.455 (0-4.113)        | 9.344 (7.283-12.447)   | 22.73 (17.366-34.973)  |
| NS<br>(allele<br>A)  | PF | 32.43 (24.45-46.05)    | 9.56 (3.81-14.60)      | 2.20 (0.69- 4.02)      | 0.28 (0-1.37)          |
|                      | CF | 9.56 (3.81-14.60)      | n.a.                   | 37.97 (21.30-69.50)    | 16.61 (7.84-28.45)     |
|                      | MF | 2.20 (0.69- 4.02)      | 37.97 (21.30-69.50)    | 37.09 (17.54-85.93)    | 13.47 (10.10-18.42)    |
|                      | AF | 0.28 (0-1.37)          | 16.61 (7.84-28.45)     | 13.47 (10.10-18.42)    | 54.37 (35.90-83.71)    |
| NS<br>(allele<br>B)  | PF | 26.852 (18.948-43.387) | 17.586 (10.898-30.56)  | 3.17 (0-9.544)         | 0.702 (0-2.214)        |
|                      | CF | 17.586 (10.898-30.56)  | 38.547 (0-1987.189)    | 36.99 (17.577-71.596)  | 0 (0-5.581)            |
|                      | MF | 3.17 (0-9.544)         | 36.99 (17.577-71.596)  | 41.7 (7.493-217.024)   | 18.022 (10.638-32.957) |
|                      | AF | 0.702 (0-2.214)        | 0 (0-5.581)            | 18.022 (10.638-32.957) | 3.239 (0-8.048)        |
| HA (H3)              | PF | 13.293 (11.055-17.062) | 6.85 (5.579-11.546)    | 0 (0-0)                | 0 (0-0)                |
|                      | CF | 6.85 (5.579-11.546)    | 4.302 (0-7.879)        | 4.857 (4.12-6.052)     | 0 (0-0)                |
|                      | MF | 0 (0-0)                | 4.857 (4.12-6.052)     | 15.856 (12.632-19.928) | 4.187 (3.505-4.951)    |
|                      | AF | 0 (0-0)                | 0 (0-0)                | 4.187 (3.505-4.951)    | 3.753 (2.108-5.934)    |
| HA (H4)              | PF | 18.126 (13.831-23.555) | 6.779 (5.571-8.844)    | 0 (0-0)                | 0 (0-0)                |
|                      | CF | 6.779 (5.571-8.844)    | 0 (0-60.553)           | 37.733 (29.793-47.428) | 0 (0-2.562)            |
|                      | MF | 0 (0-0)                | 37.733 (29.793-47.428) | 0 (0-0)                | 7.377 (3.632-9.449)    |
|                      | AF | 0 (0-0)                | 0 (0-2.562)            | 7.377 (3.632-9.449)    | 29.021 (21.051-39.507) |
| NA (N6)              | PF | 19.101 (14.67-25.125)  | 5.425 (0.776-7.372)    | 0 (0-4.759)            | 0 (0-0)                |
|                      | CF | 5.425 (0.776-7.372)    | 0 (0-4.613)            | 27.527 (20.45-40.985)  | 0 (0-1.525)            |
|                      | MF | 0 (0-4.759)            | 27.527 (20.45-40.985)  | 0 (0-3.054)            | 5.273 (3.061-6.805)    |
|                      | AF | 0 (0-0)                | 0 (0-1.525)            | 5.273 (3.061-6.805)    | n.a.                   |
| <u>NA (N8)</u>       | PF | 17.599 (13.516-31.95)  | 5.091 (3.781-6.549)    | 0 (0-0.004)            | 0 (0-1.981)            |

|                                   |       | CF                  | 5.091 (3.781-6.549) | 0 (0-0)             | 6.993 (6.033-8.44)     | 0 (0-0)               |
|-----------------------------------|-------|---------------------|---------------------|---------------------|------------------------|-----------------------|
|                                   |       | MF                  | 0 (0-0.004)         | 6.993 (6.033-8.44)  | 17.616 (14.661-24.855) | 10.335 (8.557-13.067) |
|                                   |       | AF                  | 0 (0-1.981)         | 0 (0-0)             | 10.335 (8.557-13.067)  | n.a.                  |
| Pars.<br>3-flyway<br>( $\sigma$ ) | PB2   | PF                  | 0.268 (0.258-0.28)  |                     | 0.114 (0.108-0.119)    | 0.029 (0.025-0.033)   |
|                                   |       | CF+MF               | 0.114 (0.108-0.119) |                     | 0.256 (0.242-0.275)    | 0.087 (0.081-0.092)   |
| AF                                |       | 0.029 (0.025-0.033) |                     | 0.087 (0.081-0.092) | 0.143 (0.133-0.151)    |                       |
| PB1                               | PF    | 0.287 (0.275-0.3)   |                     | 0.112 (0.106-0.12)  | 0.014 (0.012-0.019)    |                       |
|                                   | CF+MF | 0.112 (0.106-0.12)  |                     | 0.244 (0.229-0.264) | 0.093 (0.089-0.099)    |                       |
|                                   | AF    | 0.014 (0.012-0.019) |                     | 0.093 (0.089-0.099) | 0.153 (0.144-0.162)    |                       |
| PA<br>(lineage<br>B)              | PF    | 0.226 (0.219-0.239) |                     | 0.097 (0.09-0.104)  | 0.015 (0.012-0.02)     |                       |
|                                   | CF+MF | 0.097 (0.09-0.104)  |                     | 0.377 (0.352-0.404) | 0.093 (0.087-0.101)    |                       |
|                                   | AF    | 0.015 (0.012-0.02)  |                     | 0.093 (0.087-0.101) | 0.18 (0.168-0.19)      |                       |
| PA<br>(lineage<br>A)              | PF    | 0.338 (0.315-0.364) |                     | 0.13 (0.12-0.141)   | 0.025 (0.019-0.032)    |                       |
|                                   | CF+MF | 0.13 (0.12-0.141)   |                     | 0.319 (0.297-0.349) | 0.068 (0.06-0.077)     |                       |
|                                   | AF    | 0.025 (0.019-0.032) |                     | 0.068 (0.06-0.077)  | 0.116 (0.109-0.127)    |                       |
| NP                                | PF    | 0.349 (0.337-0.363) |                     | 0.111 (0.102-0.12)  | 0.035 (0.03-0.04)      |                       |
|                                   | CF+MF | 0.111 (0.102-0.12)  |                     | 0.407 (0.367-0.446) | 0.139 (0.128-0.151)    |                       |
|                                   | AF    | 0.035 (0.03-0.04)   |                     | 0.139 (0.128-0.151) | 0.165 (0.155-0.177)    |                       |
| MP                                | PF    | 0.313 (0.285-0.345) |                     | 0.116 (0.106-0.141) | 0.028 (0.022-0.037)    |                       |
|                                   | CF+MF | 0.116 (0.106-0.141) |                     | 0.278 (0.245-0.309) | 0.109 (0.101-0.123)    |                       |
|                                   | AF    | 0.028 (0.022-0.037) |                     | 0.109 (0.101-0.123) | 0.156 (0.143-0.172)    |                       |
| NS<br>(allele<br>A)               | PF    | 0.493 (0.449-0.536) |                     | 0.104 (0.085-0.133) | 0.046 (0.035-0.057)    |                       |
|                                   | CF+MF | 0.104 (0.085-0.133) |                     | 0.384 (0.319-0.439) | 0.183 (0.166-0.208)    |                       |
|                                   | AF    | 0.046 (0.035-0.057) |                     | 0.183 (0.166-0.208) | 0.228 (0.206-0.254)    |                       |
| NS<br>(allele<br>B)               | PF    | 0.27 (0.23-0.324)   |                     | 0.15 (0.129-0.178)  | 0.036 (0.024-0.051)    |                       |
|                                   | CF+MF | 0.15 (0.129-0.178)  |                     | 0.339 (0.267-0.438) | 0.124 (0.103-0.146)    |                       |
|                                   | AF    | 0.036 (0.024-0.051) |                     | 0.124 (0.103-0.146) | 0.195 (0.158-0.229)    |                       |
| HA (H3)                           | PF    | 0.246 (0.213-0.25)  |                     | 0.088 (0.079-0.099) | 0 (0-0)                |                       |
|                                   | CF+MF | 0.088 (0.079-0.099) |                     | 0.286 (0.262-0.321) | 0.074 (0.055-0.085)    |                       |
|                                   | AF    | 0 (0-0)             |                     | 0.074 (0.055-0.085) | 0.106 (0.104-0.108)    |                       |
| HA (H4)                           | PF    | 0.206 (0.163-0.242) |                     | 0.067 (0.054-0.082) | 0.017 (0.017-0.018)    |                       |
|                                   | CF+MF | 0.067 (0.054-0.082) |                     | 0.308 (0.281-0.334) | 0.098 (0.089-0.102)    |                       |

|                                |                      |                        |                        |                        |                        |                       |
|--------------------------------|----------------------|------------------------|------------------------|------------------------|------------------------|-----------------------|
|                                |                      | AF                     | 0.017 (0.017-0.018)    | 0.098 (0.089-0.102)    | 0.345 (0.314-0.363)    |                       |
|                                | NA (N6)              | PF                     | 0.208 (0.186-0.239)    | 0.092 (0.082-0.1)      | 0.012 (0.01-0.028)     |                       |
|                                |                      | CF+MF                  | 0.092 (0.082-0.1)      | 0.33 (0.291-0.371)     | 0.077 (0.068-0.09)     |                       |
|                                |                      | AF                     | 0.012 (0.01-0.028)     | 0.077 (0.068-0.09)     | n.a.                   |                       |
|                                | NA (N8)              | PF                     | 0.66 (0.571-0.692)     | 0.074 (0.061-0.091)    | 0.051 (0.051-0.093)    |                       |
|                                |                      | CF+MF                  | 0.074 (0.061-0.091)    | 0.293 (0.264-0.338)    | 0.222 (0.191-0.256)    |                       |
|                                |                      | AF                     | 0.051 (0.051-0.093)    | 0.222 (0.191-0.256)    | n.a.                   |                       |
| <b>ML<br/>3-flyway<br/>(q)</b> | PB2                  |                        | CF                     |                        |                        |                       |
|                                |                      | CF                     | 28.083 (25.286-31.159) | 6.03 (5.53-6.675)      | 0.23 (0-0.693)         |                       |
|                                |                      | CF+MF                  | 6.03 (5.53-6.675)      | 13.853 (12.483-15.763) | 7.119 (6.594-7.865)    |                       |
|                                |                      |                        | AF                     | 0.23 (0-0.693)         | 7.119 (6.594-7.865)    | 33.111 (29.32-38.211) |
|                                | PB1                  | PF                     | 34.717 (30.605-40.367) | 6.694 (6.134-7.473)    | 0 (0-0)                |                       |
|                                |                      | CF+MF                  | 6.694 (6.134-7.473)    | 16.238 (14.398-18.509) | 7.044 (6.407-7.717)    |                       |
|                                |                      | AF                     | 0 (0-0)                | 7.044 (6.407-7.717)    | 34.957 (30.429-39.994) |                       |
|                                | PA<br>(lineage<br>B) | PF                     | 11.204 (9.629-14.25)   | 3.821 (3.253-4.366)    | 0 (0-0.413)            |                       |
|                                |                      | CF+MF                  | 3.821 (3.253-4.366)    | 18.687 (16.542-21.592) | 4.805 (4.138-5.476)    |                       |
|                                |                      | AF                     | 0 (0-0.413)            | 4.805 (4.138-5.476)    | 19.476 (16.82-23.172)  |                       |
|                                | PA<br>(lineage<br>A) | PF                     | 44.124 (35.714-55.584) | 4.457 (3.812-5.533)    | 0.41 (0-0.926)         |                       |
|                                |                      | CF+MF                  | 4.457 (3.812-5.533)    | 14.644 (12.294-17.878) | 3.093 (2.692-3.734)    |                       |
|                                |                      | AF                     | 0.41 (0-0.926)         | 3.093 (2.692-3.734)    | 23.978 (18.933-28.545) |                       |
|                                | NP                   | PF                     | 22.453 (19.437-26.406) | 1.912 (1.627-2.225)    | 0.955 (0.796-1.107)    |                       |
|                                |                      | CF+MF                  | 1.912 (1.627-2.225)    | 15.748 (13.581-18.413) | 4.127 (3.648-4.716)    |                       |
|                                |                      | AF                     | 0.955 (0.796-1.107)    | 4.127 (3.648-4.716)    | 18.956 (15.556-23.352) |                       |
|                                | MP                   | PF                     | 29.455 (21.242-40.147) | 5.12 (3.911-6.765)     | 0.667 (0.281-1.388)    |                       |
|                                |                      | CF+MF                  | 5.12 (3.911-6.765)     | 20.432 (15.97-26.726)  | 6.532 (5.329-8.868)    |                       |
|                                |                      | AF                     | 0.667 (0.281-1.388)    | 6.532 (5.329-8.868)    | 22.854 (18.052-34.2)   |                       |
|                                | NS<br>(allele<br>A)  | PF                     | 32.287 (24.646-45.884) | 3.874 (2.504-5.669)    | 0.592 (0-1.527)        |                       |
|                                |                      | CF+MF                  | 3.874 (2.504-5.669)    | 38.470 (24.235-66.988) | 14.171 (11.249-18.323) |                       |
| AF                             |                      | 0.592 (0-1.527)        | 14.171 (11.249-18.323) | 54.714 (35.998-83.729) |                        |                       |
| NS<br>(allele<br>B)            | PF                   | 27.868 (19.667-44.028) | 10.456 (7.31-14.673)   | 0.17 (0-1.693)         |                        |                       |
|                                | CF+MF                | 10.456 (7.31-14.673)   | 34.041 (20.176-59.659) | 9.033 (5.995-14.381)   |                        |                       |
|                                | AF                   | 0.17 (0-1.693)         | 9.033 (5.995-14.381)   | 4.653 (0-9.457)        |                        |                       |

|         |       |                        |                        |                        |
|---------|-------|------------------------|------------------------|------------------------|
| HA (H3) | PF    | 14.038 (11.764-18.116) | 2.665 (2.253-3.345)    | 0 (0-0)                |
|         | CF+MF | 2.665 (2.253-3.345)    | 7.769 (6.595-9.111)    | 2.327 (1.824-2.793)    |
|         | AF    | 0 (0-0)                | 2.327 (1.824-2.793)    | 4.014 (2.55-6.345)     |
| HA (H4) | PF    | 18.274 (14.039-24.018) | 3.473 (2.824-4.565)    | 0 (0-0)                |
|         | CF+MF | 3.473 (2.824-4.565)    | 32.878 (25.066-44.674) | 3.142 (2.048-4.096)    |
|         | AF    | 0 (0-0)                | 3.142 (2.048-4.096)    | 30.051 (22.135-41.343) |
| NA (N6) | PF    | 19.254 (14.8-25.311)   | 2.858 (2.333-3.652)    | 0 (0-0)                |
|         | CF+MF | 2.858 (2.333-3.652)    | 19.614 (14.913-27.745) | 2.776 (2.109-3.425)    |
|         | AF    | 0 (0-0)                | 2.776 (2.109-3.425)    | n.a.                   |
| NA (N8) | PF    | 19.306 (15.576-32.644) | 1.557 (1.245-2.098)    | 0 (0-2.459)            |
|         | CF+MF | 1.557 (1.245-2.098)    | 8.703 (7.391-10.492)   | 8.181 (6.66-12.001)    |
|         | AF    | 0 (0-2.459)            | 8.181 (6.66-12.001)    | n.a.                   |

n.a. The N6 and N8 data sets only had one geographical state in the Atlantic flyway (AF) such that the level of gene flow within this flyway could not be inferred.
